# Supplementary material for: Dual surface modification of carbon materials by polydopamine and phosphomolybdic acid for supercapacitor application
Source: Royal Society of Chemistry journal article supplement (doi:10.1039/c9dt03831k), 2019-01-01
Supplement: c9dt03831k1.pdf [file c9dt03831k1.pdf]

**Supporting Information:**

**Dual surface modification of carbon materials by polydopamine and phosphomolybdic acid for supercapacitor application**

Zhong Jie Zhang<sup>1,\*</sup>, Qing Zhu Song<sup>1</sup>, Wen Xin He<sup>1</sup>, Ping Ping Liu<sup>1</sup>, Ying Hui Xiao<sup>1</sup>,  
Jing Yan Liang<sup>1</sup>, and Xiang Ying Chen<sup>2,\*</sup>

*<sup>1</sup>School of Chemistry & Chemical Engineering, Anhui Province Key Laboratory of Environment-friendly Polymer Materials, Anhui University, Hefei 230601, Anhui, P. R. China. \* The corresponding author. E-mail: [zhangzj06@ahu.edu.cn](mailto:zhangzj06@ahu.edu.cn).*

*<sup>2</sup>School of Chemistry and Chemical Engineering, Anhui Key Laboratory of Controllable Chemistry Reaction & Material Chemical Engineering, Hefei University of Technology, Hefei, Anhui 230009, P. R. China. E-mail: [chenxy@hfut.edu.cn](mailto:chenxy@hfut.edu.cn).*

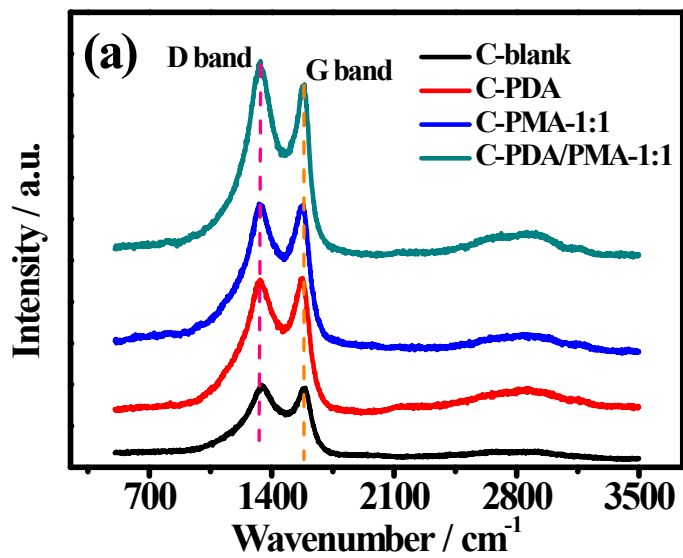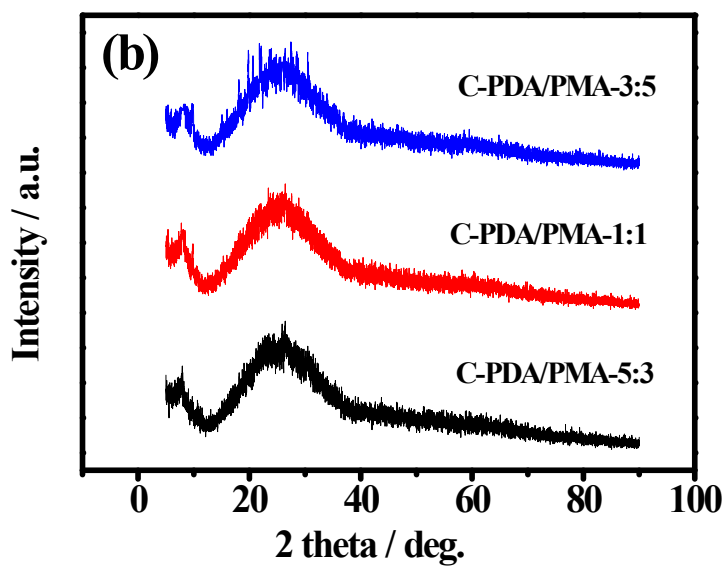

Figure S1. Raman and XRD results of carbon samples.

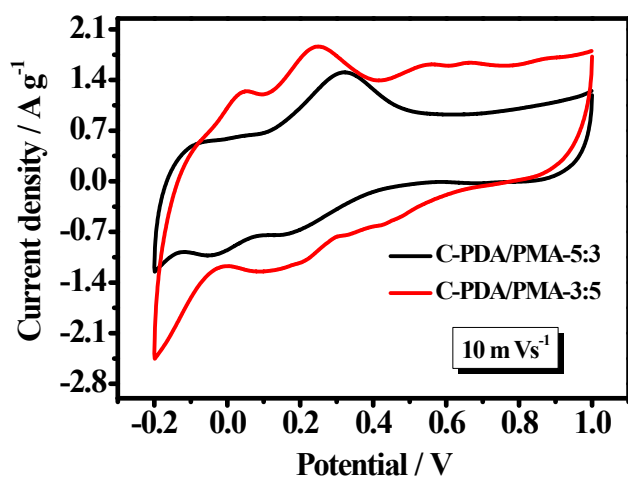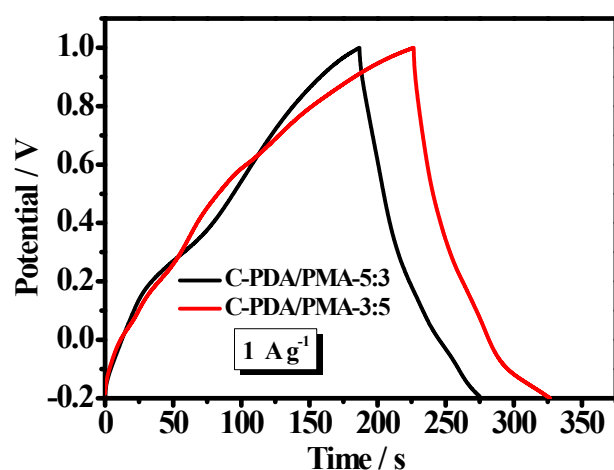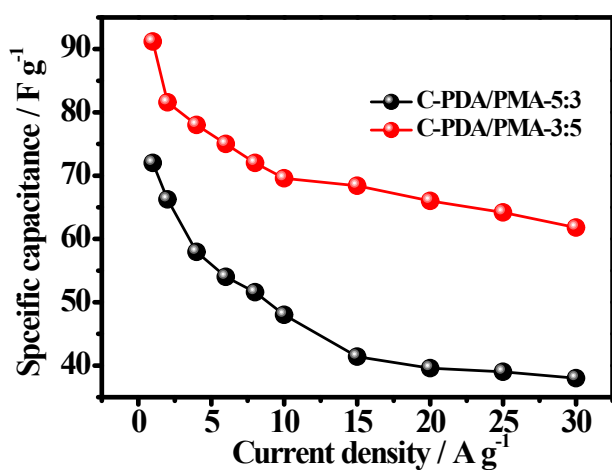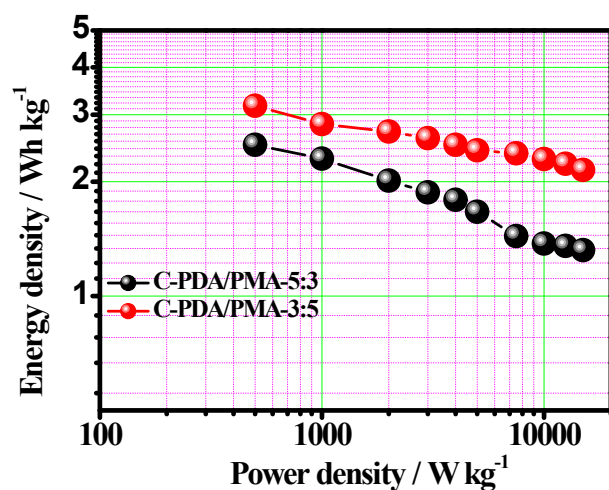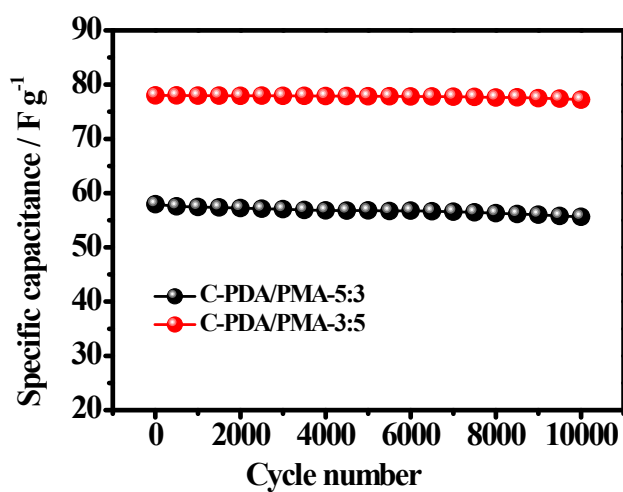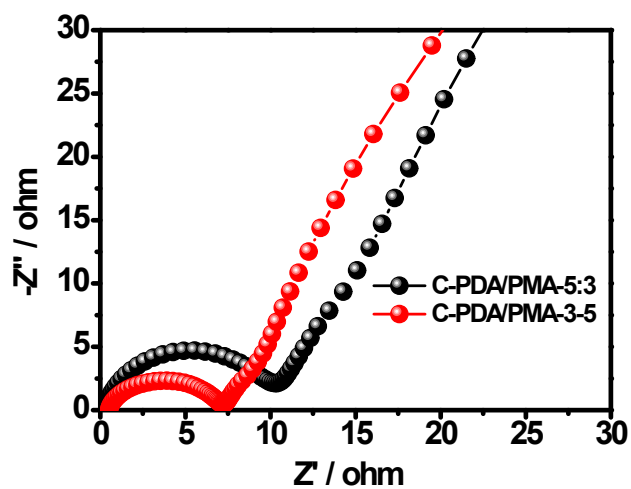

Figure S2. Electrochemical performance of the C-PDA/PMA-5:3, C-PDA/PMA-3:5 samples when tested in a two-electrode configuration.
